# Supplementary material
Source: PubMed Central journal article supplement (PMC4983267)

**A** *ISN-Gal4,ppk28-Gal4*

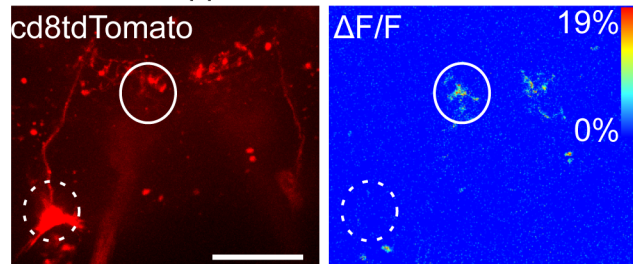

water sensory

ISNs

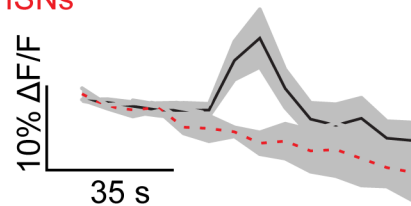

**B** *954-Gal4,Gr64f-Gal4*

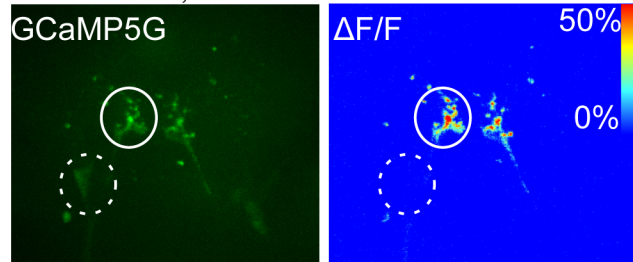

sugar sensory

ISNs

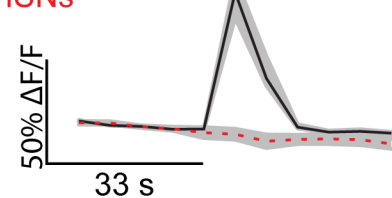

**C** *954-Gal4,Gr66a-Gal4*

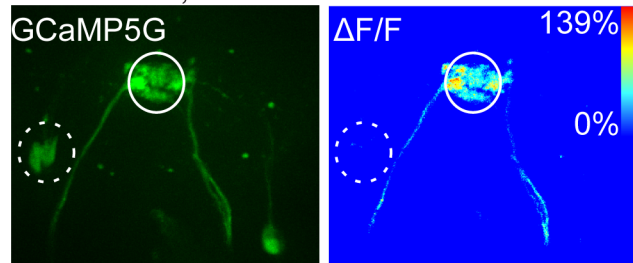

bitter sensory

ISNs

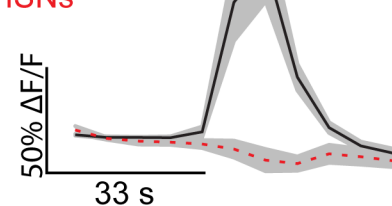

Supplement: NIHMS800796-supplement-2.pdf [file NIHMS800796-supplement-2.pdf]
