# Supplementary material
Source: PubMed Central journal article supplement (PMC4983267)

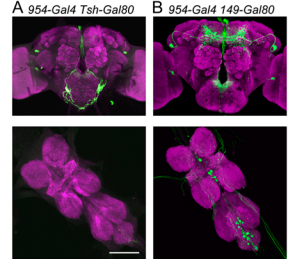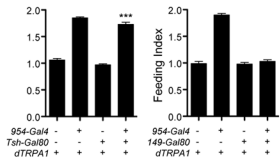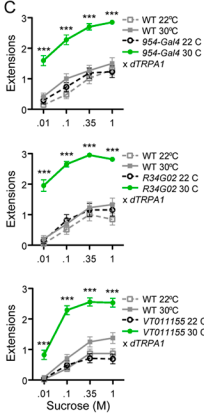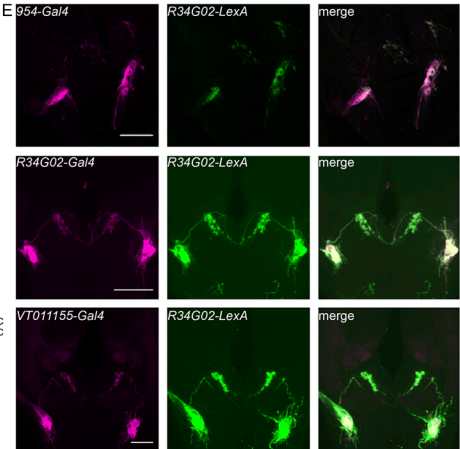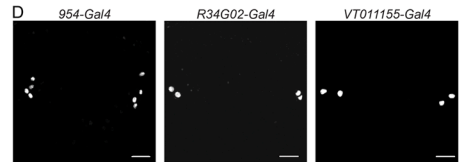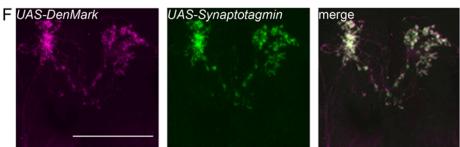

Supplement: NIHMS800796-supplement-1.pdf [file NIHMS800796-supplement-1.pdf]

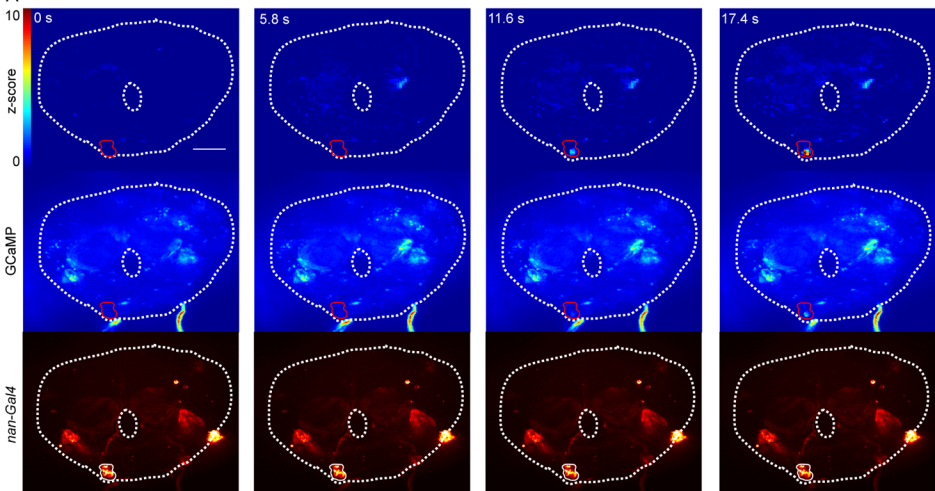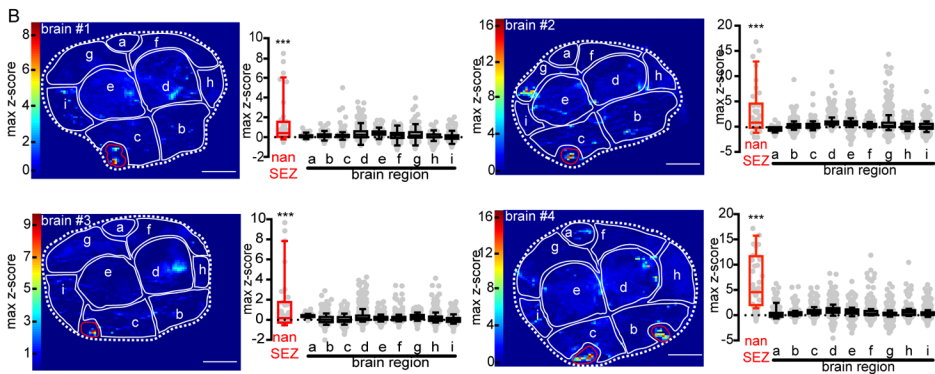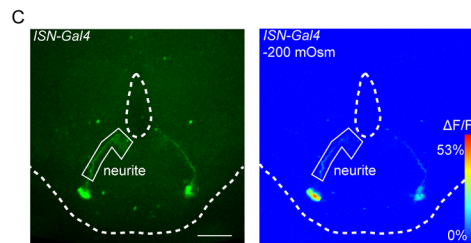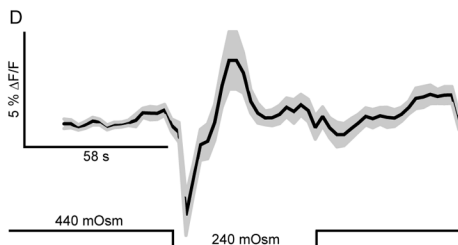

Supplement: NIHMS800796-supplement-3.pdf [file NIHMS800796-supplement-3.pdf]

A

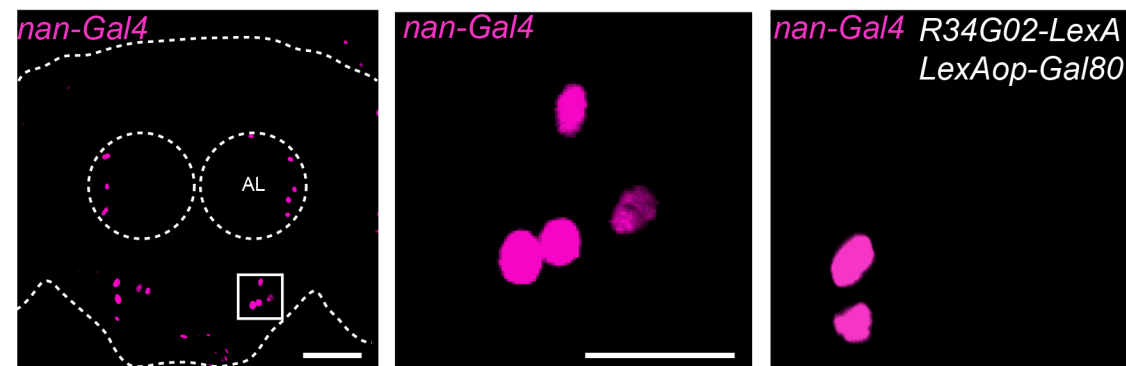

B

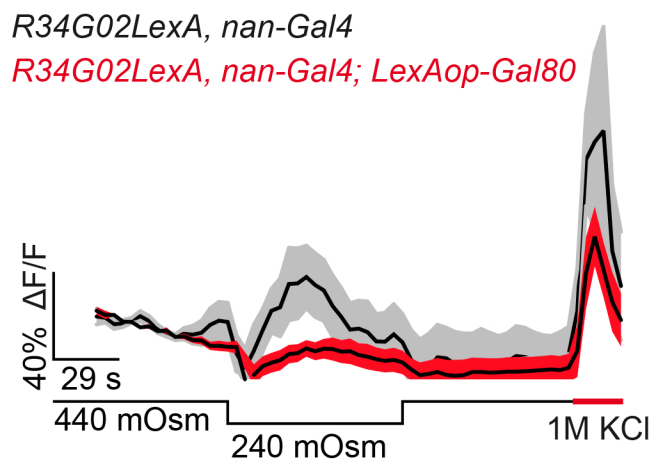

C

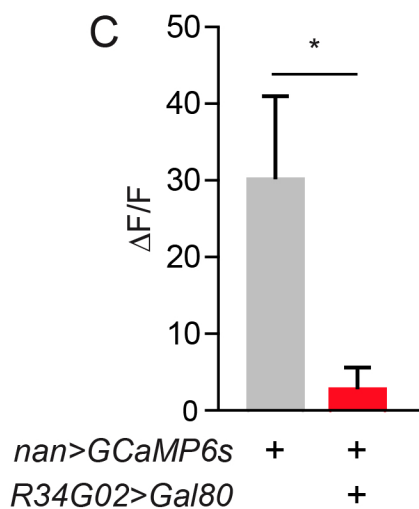

D

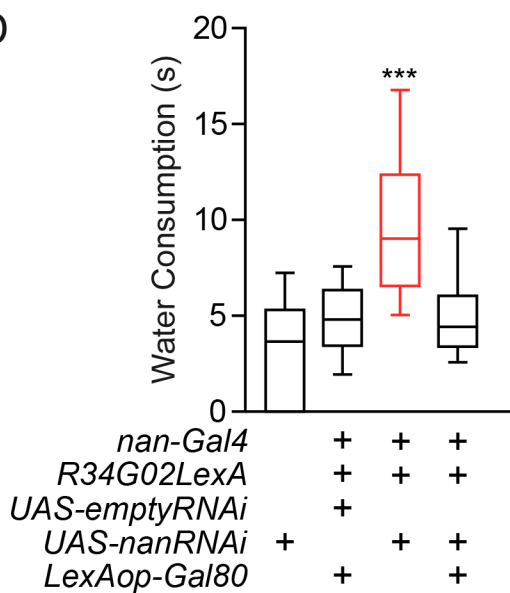

E

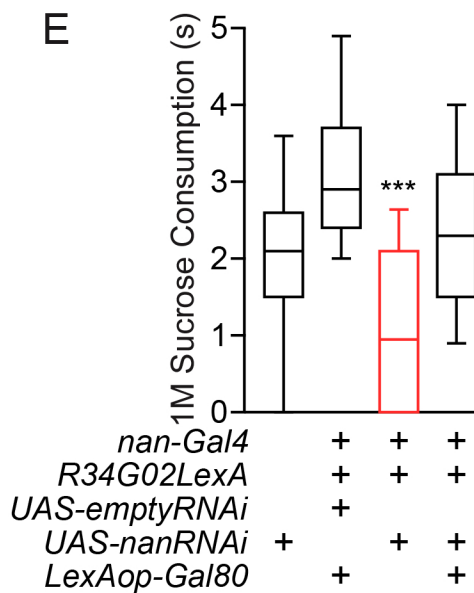

Supplement: NIHMS800796-supplement-4.pdf [file NIHMS800796-supplement-4.pdf]

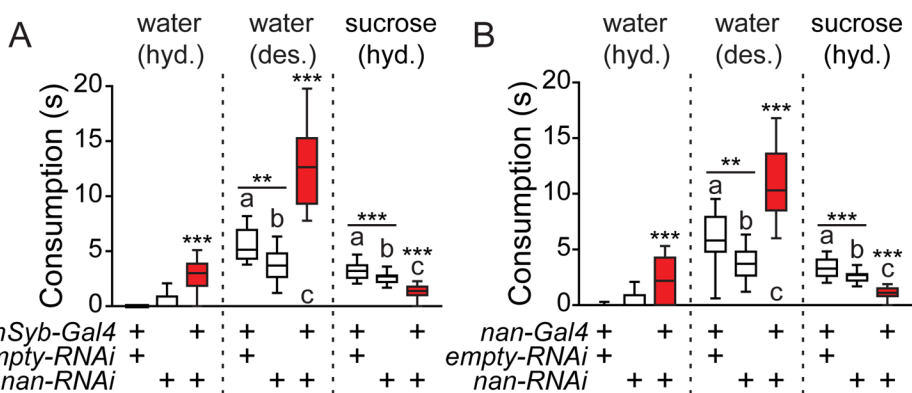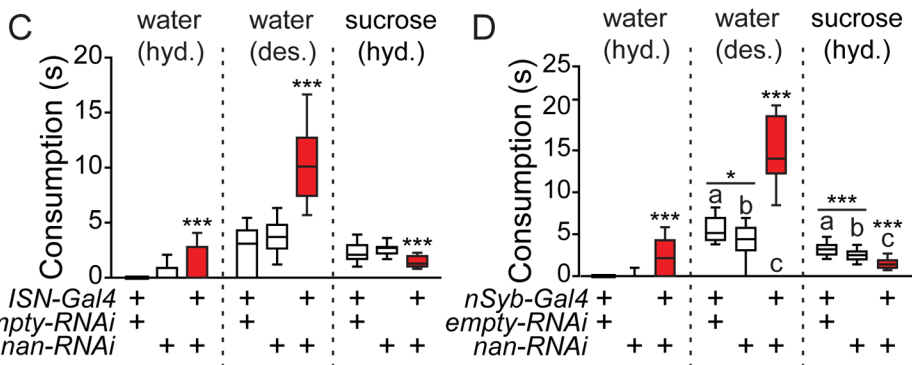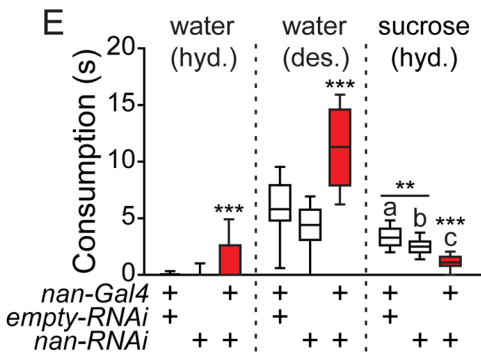

Supplement: NIHMS800796-supplement-5.pdf [file NIHMS800796-supplement-5.pdf]
